# Supplementary material for: Host association and intracellularity evolved multiple times independently in the Rickettsiales
Source: Springer Nature journal article supplement (doi:10.1038/s41467-024-45351-7), 2024-02-06
Supplement: 41467_2024_45351_MOESM3_ESM.pdf [file 41467_2024_45351_MOESM3_ESM.pdf]

## Reporting Summary

Nature Portfolio wishes to improve the reproducibility of the work that we publish. This form provides structure for consistency and transparency in reporting. For further information on Nature Portfolio policies, see our [Editorial Policies](#) and the [Editorial Policy Checklist](#).

### Statistics

For all statistical analyses, confirm that the following items are present in the figure legend, table legend, main text, or Methods section.

n/a Confirmed

- The exact sample size ( $n$ ) for each experimental group/condition, given as a discrete number and unit of measurement
- A statement on whether measurements were taken from distinct samples or whether the same sample was measured repeatedly
- The statistical test(s) used AND whether they are one- or two-sided  
*Only common tests should be described solely by name; describe more complex techniques in the Methods section.*
- A description of all covariates tested
- A description of any assumptions or corrections, such as tests of normality and adjustment for multiple comparisons
- A full description of the statistical parameters including central tendency (e.g. means) or other basic estimates (e.g. regression coefficient) AND variation (e.g. standard deviation) or associated estimates of uncertainty (e.g. confidence intervals)
- For null hypothesis testing, the test statistic (e.g.  $F$ ,  $t$ ,  $r$ ) with confidence intervals, effect sizes, degrees of freedom and  $P$  value noted  
*Give  $P$  values as exact values whenever suitable.*
- For Bayesian analysis, information on the choice of priors and Markov chain Monte Carlo settings
- For hierarchical and complex designs, identification of the appropriate level for tests and full reporting of outcomes
- Estimates of effect sizes (e.g. Cohen's  $d$ , Pearson's  $r$ ), indicating how they were calculated

*Our web collection on [statistics for biologists](#) contains articles on many of the points above.*

### Software and code

Policy information about [availability of computer code](#)

- Data collection All data (genome or metagenome-assembled genome sequences and/or their annotated proteins) were individually downloaded from NCBI ftp (via unix command line). No additional software was used for data collection.
- Data analysis FastQC 0.11.7, MinKNOW 18.12.9, guppy 5.0.1, Porechop 0.2.4, NanoPlot 1.23.0, SPAdes 3.6, blobology (<https://github.com/blaxterlab/blobology>), bowtie2 2.4.2, Bandage 0.8.1, prokka 1.10, Unicycler 0.4.8, diamond 0.9, prodigal 2.6.3, finchv 1.3.1, BUSCO 5.0.0, eggno-mapper 2.0.6, MAFFT 7.475, BMGE 1.12, FastTree 2.1, AMAS (<https://github.com/marekborowiec/AMAS>), IQ-TREE 1.6.12, enveomics toolbox (<http://enve-omics.ce.gatech.edu/aai/>), OrthoFinder 2.5.4. The usage and version of each software is described in the methods section of the manuscript and/or in the Supplementary Notes.

For manuscripts utilizing custom algorithms or software that are central to the research but not yet described in published literature, software must be made available to editors and reviewers. We strongly encourage code deposition in a community repository (e.g. GitHub). See the Nature Portfolio [guidelines for submitting code & software](#) for further information.

## Data

Policy information about [availability of data](#)

All manuscripts must include a [data availability statement](#). This statement should provide the following information, where applicable:

- Accession codes, unique identifiers, or web links for publicly available datasets
- A description of any restrictions on data availability
- For clinical datasets or third party data, please ensure that the statement adheres to our [policy](#)

Sequences obtained in this project were deposited to NCBI under accession number PRJNA831616. The annotated genome sequences of the symbiont of *Reticulomyxa filosa* is available on Zenodo (doi: 10.5281/zenodo.10324454). Accession numbers of published Rickettsiales assemblies (including all initial MAGs) analysed in this study are provided herein (Supplementary Data 9). The eggnog (<http://http://eggog5.embl.de>), BioCyc (<https://biocyc.org>), TCDB (<https://www.tcdb.org>), and VFDB (<http://www.mgc.ac.cn/VFs>) databases were also employed in this study.

## Research involving human participants, their data, or biological material

Policy information about studies with [human participants or human data](#). See also policy information about [sex, gender \(identity/presentation\), and sexual orientation](#) and [race, ethnicity and racism](#).

Reporting on sex and gender

Reporting on race, ethnicity, or other socially relevant groupings

Population characteristics

Recruitment

Ethics oversight

Note that full information on the approval of the study protocol must also be provided in the manuscript.

## Field-specific reporting

Please select the one below that is the best fit for your research. If you are not sure, read the appropriate sections before making your selection.

Life sciences  Behavioural & social sciences  Ecological, evolutionary & environmental sciences

For a reference copy of the document with all sections, see [nature.com/documents/nr-reporting-summary-flat.pdf](https://nature.com/documents/nr-reporting-summary-flat.pdf)

## Ecological, evolutionary & environmental sciences study design

All studies must disclose on these points even when the disclosure is negative.

Study description

Research sample

Sampling strategy

Data collection

outsourcing (Illumina reads) and by M. Castelli (Oxford Nanopore reads). Reads of the *Reticulomyxa* host were provided by the authors of the original study (doi:10.1016/j.cub.2013.11.027), as detailed in the acknowledgements section. Genome assembly was performed by M. Castelli, T. Nardi, L. Gammuto, and G. Bellinzona.

All other employed genomes and metagenome-derived genomes were derived from published studies, and were downloaded directly from NCBI repositories. Selection criteria were based on phylogenetic proximity and representativeness, as detailed in the Supplementary information.

#### Timing and spatial scale

Samples were collected on:

-NDG2: 15th March 2013

-IBS-3; May 2018

There was no specific rationale for sampling, each sample was taken individually and then inspected for the potential presence of protists, which were then screened for the presence of Rickettsiales bacteria

#### Data exclusions

The newly assembled Rickettsiales bacteria are obligatorily associated with unicellular eukaryotic hosts. Thus, the raw sequencing data included host sequences (and in some cases sequences from other associated prokaryotes). An ad hoc procedure (described in the methods) was applied to remove those sequences from the assembly, and select only those belonging to the bacteria of interest.

For the phylogenetic and evolutionary reconstructions, initially selected published metagenome-assembled genomes (MAGs) below certain thresholds of BUSCO scores were discarded (below 50% proteobacterial orthologs, and/or 5% or more of duplicated ones). Furthermore, all MAGs which, based on our phylogeny, were found not to be affiliated to Rickettsiales, were discarded from the final dataset. The final dataset contained only one representative (the one with the best BUSCO scores) for each "cluster" of MAGs, namely each monophyletic lineage of MAGs all sharing average aminoacidic identity of 85% or higher.

#### Reproducibility

All the sources (i.e. accession numbers) of data employed in this study are reported in the Supplementary material, which also includes a detailed account of the software used and all the procedures applied, allowing reproducibility

#### Randomization

Randomization was not relevant for the study, because the organisms were not assigned to groups

#### Blinding

Blinding was not relevant for the present study

Did the study involve field work?  Yes  No

## Field work, collection and transport

#### Field conditions

Climatic conditions were not recorded and are not relevant for the study

#### Location

-Sample NDG2: Naval Dockyard Gate in Visakhapatnam (Andhra Pradesh, India) at sea level; coordinates: 17.712083, 83.263111

-Plagiopyla frontata IBS-3; Baltic Sea in Inkoo (Finland) at sea level; coordinates: 60.042403, 24.006956

#### Access & import/export

Sampling locations were reached by car. No permissions were required for sampling in the selected sites. All other protists were derived from previous studies

#### Disturbance

No disturbance on the sites was caused, only small amounts of water and surface sediment were samples

## Reporting for specific materials, systems and methods

We require information from authors about some types of materials, experimental systems and methods used in many studies. Here, indicate whether each material, system or method listed is relevant to your study. If you are not sure if a list item applies to your research, read the appropriate section before selecting a response.

### Materials & experimental systems

| n/a                                 | Involved in the study                                           |
|-------------------------------------|-----------------------------------------------------------------|
| <input checked="" type="checkbox"/> | <input type="checkbox"/> Antibodies                             |
| <input type="checkbox"/>            | <input checked="" type="checkbox"/> Eukaryotic cell lines       |
| <input checked="" type="checkbox"/> | <input type="checkbox"/> Palaeontology and archaeology          |
| <input type="checkbox"/>            | <input checked="" type="checkbox"/> Animals and other organisms |
| <input checked="" type="checkbox"/> | <input type="checkbox"/> Clinical data                          |
| <input checked="" type="checkbox"/> | <input type="checkbox"/> Dual use research of concern           |
| <input checked="" type="checkbox"/> | <input type="checkbox"/> Plants                                 |

### Methods

| n/a                                 | Involved in the study                           |
|-------------------------------------|-------------------------------------------------|
| <input checked="" type="checkbox"/> | <input type="checkbox"/> ChIP-seq               |
| <input checked="" type="checkbox"/> | <input type="checkbox"/> Flow cytometry         |
| <input checked="" type="checkbox"/> | <input type="checkbox"/> MRI-based neuroimaging |

## Eukaryotic cell lines

Policy information about [cell lines and Sex and Gender in Research](#)

#### Cell line source(s)

Four freshwater or marine ciliate protist cell lines were obtained in previous studies (doi: 10.1038/srep03305; doi: 10.1038/

|                                                                      |                                                                                                                                                                                                  |
|----------------------------------------------------------------------|--------------------------------------------------------------------------------------------------------------------------------------------------------------------------------------------------|
| Cell line source(s)                                                  | s41598-018-37629-w; doi: :10.1128/AEM.02284-16; doi: 10.1093/molbev/msn266).<br>Two additional ones (one marine water and another one from brackish water) were newly isolated during this study |
| Authentication                                                       | Microscopy and 18S rRNA gene sequencing were used for authentication                                                                                                                             |
| Mycoplasma contamination                                             | This is not relevant for protist cultures                                                                                                                                                        |
| Commonly misidentified lines<br>(See <a href="#">ICLAC</a> register) | This is not relevant for protist cultures                                                                                                                                                        |

## Animals and other research organisms

Policy information about [studies involving animals](#); [ARRIVE guidelines](#) recommended for reporting animal research, and [Sex and Gender in Research](#)

|                         |                                                                                                                                                                                                                                                                                                                                                                                                                                                                                                                                        |
|-------------------------|----------------------------------------------------------------------------------------------------------------------------------------------------------------------------------------------------------------------------------------------------------------------------------------------------------------------------------------------------------------------------------------------------------------------------------------------------------------------------------------------------------------------------------------|
| Laboratory animals      | This study did not involved laboratory animals (or any other animal)                                                                                                                                                                                                                                                                                                                                                                                                                                                                   |
| Wild animals            | This study did not involved laboratory animals (or any other animal)                                                                                                                                                                                                                                                                                                                                                                                                                                                                   |
| Reporting on sex        | Not relevant for the organisms involved in this study                                                                                                                                                                                                                                                                                                                                                                                                                                                                                  |
| Field-collected samples | Sample NDG2 (and isolated protist culture) was kept at 19°C, with a light/dark period of 12h/12h. The isolated protist culture (Euplotes woodruffi) was maintained by feeding with the unicellular alga Dunaliella tertiolecta, in artificial water at 5‰ salinity, following previously established protocols (e.g., doi: 10.1128/AEM.03105-09).<br>Sample IBS-3, including protist cells, was kept at 19°C in the dark, in microoxic-anoxic conditions, following a previously established protocol (doi: 10.1093/zoolinnear/zly041) |
| Ethics oversight        | The organisms involved in the study are not covered by ethical legislation. They are unicellular eukaryotic microbes (protists) that feed on bacteria or unicellular algae, and harbour intracellular bacteria.                                                                                                                                                                                                                                                                                                                        |

Note that full information on the approval of the study protocol must also be provided in the manuscript.

## Plants

|                       |                                                                         |
|-----------------------|-------------------------------------------------------------------------|
| Seed stocks           | This study did not involve any seed stock (or any other plant material) |
| Novel plant genotypes | This study did not involve any plant (or plant-derived material)        |
| Authentication        | This study did not involve any plant (or plant-derived material)        |
